# Supplementary material for: The effect of surgeon’s preference for hybrid or cemented fixation on the long-term survivorship of total knee replacement: An analysis of 39,623 prostheses from the Australian Orthopaedic Association National Joint Replacement Registry
Source: PubMed Central journal article supplement (PMC6055785; doi:10.1080/17453674.2018.1449466), 2018-03-12
Supplement: IORT_A_1449466_SM3659.pdf [file IORT_A_1449466_SM3659.pdf]

## Supplementary data

Table 4. Revision diagnosis of primary total knee replacement by surgeon preference with osteoarthritis

| Revision diagnosis  | Routinely cemented<br>(n = 30,544) |     |                | Routinely hybrid<br>(n = 9,079) |     |                |
|---------------------|------------------------------------|-----|----------------|---------------------------------|-----|----------------|
|                     | n                                  | %   | % of revisions | n                               | %   | % of revisions |
| Infection           | 167                                | 0.5 | 28.7           | 48                              | 0.5 | 30.0           |
| Loosening/lysis     | 101                                | 0.3 | 17.4           | 23                              | 0.3 | 14.4           |
| Patellofemoral pain | 70                                 | 0.2 | 12.0           | 23                              | 0.3 | 14.4           |
| Pain                | 56                                 | 0.2 | 9.6            | 13                              | 0.1 | 8.1            |
| Instability         | 46                                 | 0.2 | 7.9            | 19                              | 0.2 | 11.9           |
| Other               | 142                                | 0.5 | 24.4           | 34                              | 0.4 | 21.2           |
| Number of revisions | 582                                | 1.9 | 100            | 160                             | 1.8 | 100            |

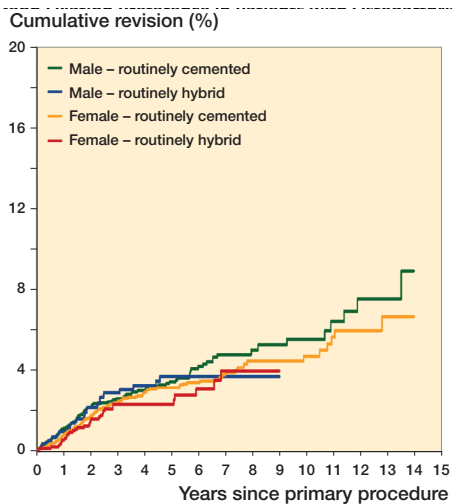

Figure 4. Cumulative percentage revision of primary total knee replacement for patients aged < 65 years by sex and surgeon fixation preference in patients with osteoarthritis.

HR adjusted for age, entire period:

- Male RC vs male RH: HR = 1.03 (0.70–1.50), p=0.9)
- Male RH vs female RH: HR = 1.32 (0.82–2.12), p = 0.3)
- Male RC vs female RC: HR = 1.18 (0.93–1.50), p = 0.2)
- Female RC vs female RH: HR = 1.15 (0.79–1.67), p = 0.5)

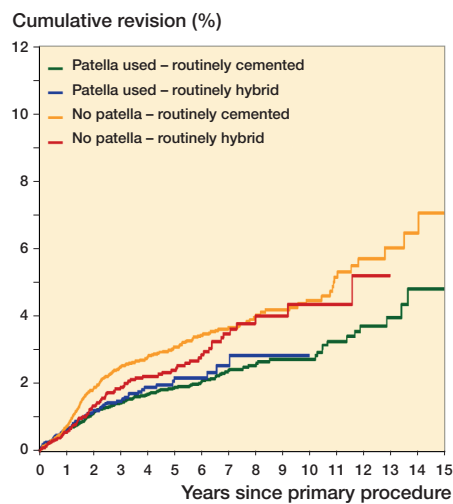

Figure 6. Cumulative percentage revision of primary total knee replacement by patella usage and surgeon fixation preference in patients with osteoarthritis.

HR adjusted for age and sex, entire period:

- Patella used RC vs patella used RH: HR = 0.92 (0.71–1.21), p = 0.6
- Patella used RH vs no patella RH: HR = 0.83 (0.60–1.13), p = 0.2
- Patella used RC vs No patella RC: HR = 0.67 (0.56–0.78), p < 0.001
- No patella RC vs no patella RH: HR = 1.15 (0.91–1.44), p = 0.3
